# Supplementary material for: Molecular Epidemiology and Assemblage Typing of Giardia duodenalis in School-Age Children Situated along the Southern Shoreline of Lake Malawi, Malawi
Source: PubMed Central journal article supplement (PMC10484258; doi:10.4269/ajtmh.23-0156), 2023-08-07
Supplement: tpmd230156.SD2.pdf [file tpmd230156.SD2.pdf]

Molecular epidemiology and assemblage typing of *Giardia duodenalis* in school-aged children situated along the southern shoreline of Lake Malawi, Malawi

**Supplemental file 2.**

**Table 1A:** Primer and probe sequences used to detect and amplify a 62-bp *G. duodenalis*-specific rRNA region (18S gene) within the small subunit ribosomal ribonucleic acid (SSU RNA) and an 89-bp fragment of the PhHV-1 glycoprotein B gene<sup>33</sup>. Oligonucleotide sequences are shown from 5' end to 3' end.

|      | Name                       | Oligonucleotide sequence (5' – 3')              |
|------|----------------------------|-------------------------------------------------|
| FW*  | <b><i>Giardia</i>-80F</b>  | GACGGCTCAGGACAACGGTT                            |
| RV†  | <b><i>Giardia</i>-127R</b> | TTGCCAGCGGTGTCCG                                |
| Pro‡ | <b><i>Giardia</i>-105T</b> | (FAM <sup>¥</sup> ) CCCGCGGCGGTCCCTGCTAG        |
| FW*  | <b>PhHV-1-267s</b>         | GGCGAATCACAGATTGAATC                            |
| RV†  | <b>PhHV-1-337as</b>        | GCGGTTCCAAACGTACCAA                             |
| Pro‡ | <b>PhHV-1-305tq</b>        | (Cy5 <sup>¥</sup> ) TTTTATGTGTCCGCCACCATCTGGATC |

\*Forward primer

†Reverse primer

‡Probe

¥Fluorophore

**Table 1B:** Reaction mix used to carry out a duplex real-time PCR to detect and amplify a 62-bp *G. duodenalis*-specific rRNA region (18S gene) within the small subunit ribosomal ribonucleic acid (SSU RNA) and an 89-bp fragment of the PhHV-1 glycoprotein B gene. Adapted from<sup>33</sup>.

|                                          | Concentration | Per 1 sample (µl) |
|------------------------------------------|---------------|-------------------|
| ddH <sub>2</sub> O                       | /             | 6.2               |
| FW* ( <i>Giardia</i> -80F)               | 100 nM        | 0.25              |
| RV† ( <i>Giardia</i> -127R)              | 100 nM        | 0.25              |
| Pro‡ ( <i>Giardia</i> -105T)             | 100 nM        | 0.25              |
| FW* (PhHV-1-267s)                        | 60 nM         | 0.15              |
| RV† (PhHV-1-337as)                       | 60 nM         | 0.15              |
| Pro‡ (PhHV-1-305tq)                      | 100 nM        | 0.15              |
| AppPROBE No ROX mix (Appleton Woods, UK) | /             | 12.5              |
| DNA                                      | /             | 5                 |
|                                          |               | 25                |

\*Forward primer

†Reverse primer

‡Probe

**Table 1C:** Cycling conditions used to carry out a duplex real-time PCR to detect and amplify a 62-bp *G. duodenalis*-specific rRNA region (18S gene) within the small subunit ribosomal ribonucleic acid (SSU RNA) and an 89-bp fragment of the PhHV-1 glycoprotein B gene. Adapted from<sup>33</sup>.

| PCR step     | Time   | Temp  | Cycles |
|--------------|--------|-------|--------|
| Denaturation | 15 min | 95 °C | /      |
| Annealing    | 15 sec | 95 °C | 45     |
|              | 30 sec | 60 °C |        |

**Table 2A:** Primer sequences used to detect and amplify a 511-bp region of the *G. duodenalis*  $\beta$ -giardin (*bg*) locus for genotyping and phylogenetic analysis<sup>34</sup>. Both initial and nested PCR primer sequences are shown. Oligonucleotide sequences are shown from 5' end to 3' end.

|     | Name        | Oligonucleotide sequence (5' – 3') | PCR     |
|-----|-------------|------------------------------------|---------|
| FW* | <b>G7</b>   | AAGCCCGACGACCTCACCCGCAGTGC         | Initial |
| RV† | <b>G759</b> | GAGGCCGCCCTGGATCTTCGAGACGAC        |         |
| FW* | <b>BGf</b>  | GAACGAACGAGATCGAGGTCCG             | Nested  |
| RV† | <b>BGr</b>  | CTCGACGAGCTTCGTGTT                 |         |

\*Forward primer

†Reverse primer

**Table 2B:** Reaction mix used to carry out a nested PCR to detect and amplify a 511-bp region of the *G. duodenalis*  $\beta$ -giardin (*bg*) locus for genotyping and phylogenetic analysis<sup>34</sup>, with minor modifications. Both initial and nested PCR reaction mixes are shown.

|                                     | Concentration | x1 sample ( $\mu$ l)<br>(Initial PCR) | Per 1 sample ( $\mu$ l)<br>(Nested PCR) |
|-------------------------------------|---------------|---------------------------------------|-----------------------------------------|
| ddH <sub>2</sub> O                  | /             | 9.25                                  | 10.25                                   |
| FW* (G7)                            | 250 nM        | 0.625                                 | /                                       |
| RV† (G759)                          | 250 nM        | 0.625                                 | /                                       |
| FW* (BGf)                           | 250 nM        | /                                     | 0.625                                   |
| RV† (BGr)                           | 250 nM        | /                                     | 0.625                                   |
| Hi-Fi Taq (New England Biolabs, UK) | /             | 12.5                                  | 12.5                                    |
| DNA                                 | /             | <b>2</b>                              | <b>1</b><br>(of initial PCR product)    |
|                                     |               | <b>25</b>                             | <b>25</b>                               |

\*Forward primer

†Reverse primer

**Table 2C:** PCR conditions used to carry out a nested PCR to detect and amplify a 511-bp region of the *G. duodenalis*  $\beta$ -giardin (*bg*) locus for genotyping and phylogenetic analysis<sup>34</sup>, with minor modifications. Both initial and nested PCR conditions are shown.

| PCR step     | Time   | Temp                                      | Cycles |
|--------------|--------|-------------------------------------------|--------|
| Denaturation | 30 sec | 98 °C                                     | /      |
| Annealing    | 10 sec | 98 °C                                     | 40     |
|              | 30 sec | 65 °C (initial PCR)<br>64 °C (nested PCR) |        |
|              | 30 sec | 72 °C                                     |        |
| Extension    | 2 min  | 72 °C                                     | /      |

**Table 3A:** Primer and probe sequences used to detect and amplify *G. duodenalis* assemblage A- and B-specific fragments within the *tpi* locus (both 77-bp in length)<sup>34,35</sup>. Oligonucleotide sequences are shown from 5' end to 3' end.

|      | Name        | Oligonucleotide sequence (5' – 3')     | Target <i>G. duodenalis</i> assemblage |
|------|-------------|----------------------------------------|----------------------------------------|
| FW*  | <b>GDAF</b> | CATTGCCCTTCCGCC                        | A                                      |
| RV†  | <b>GDAR</b> | CTGCGCTGCTATCCTCAACTG                  |                                        |
| Pro‡ | <b>GDAT</b> | (VIC <sup>¥</sup> ) CCATTGCGGCAAACA    |                                        |
| FW*  | <b>GDBF</b> | GATGAACGCAAGGCCAATAA                   | B                                      |
| RV†  | <b>GDBR</b> | TCTTTGATTCTCCAATCTCCTTCTT              |                                        |
| Pro‡ | <b>GDBT</b> | (FAM <sup>¥</sup> ) AATATTGCTCAGCTCGAG |                                        |

\*Forward primer

†Reverse primer

‡Probe

¥ Fluorophore

**Table 3B:** Reaction mix used to carry out a duplex real-time PCR to detect and amplify *G. duodenalis* assemblage A- and B-specific fragments within the *tpi* locus (both 77-bp in length). Adapted from<sup>34,35</sup>.

|                                          | Concentration | Per 1 sample (µl) |
|------------------------------------------|---------------|-------------------|
| ddH <sub>2</sub> O                       | /             | 3                 |
| FW* (GDAF): A                            | 300 nM        | 0.75              |
| RV† (GDAR): A                            | 900 nM        | 2.25              |
| Pro‡ (GDAT): A                           | 100 nM        | 0.25              |
| FW* (GDBF): B                            | 300 nM        | 0.75              |
| RV† (GDBR): B                            | 900 nM        | 2.25              |
| Pro‡ (GDBT): B                           | 100 nM        | 0.25              |
| AppPROBE No ROX mix (Appleton Woods, UK) | /             | 12.5              |
| DNA                                      | /             | 3                 |
|                                          |               | 25                |

\**Forward primer*

†*Reverse primer*

‡*Probe*

**Table 3C:** Cycling conditions used to carry out a duplex real-time PCR to detect and amplify *G. duodenalis* assemblage A- and B-specific fragments within the *tpi* locus (both 77-bp in length). Adapted from<sup>34,35</sup>.

| <b>PCR step</b> | <b>Time</b> | <b>Temp</b> | <b>Cycles</b> |
|-----------------|-------------|-------------|---------------|
| Denaturation    | 10 min      | 95 °C       | /             |
| Annealing       | 15 sec      | 95 °C       | 50            |
|                 | 60 sec      | 60 °C       |               |
